# Supplementary material
Source: publisher site journal article supplement (https://www.dovepress.com/article/214228)
Supplement: Supplementary file 1 [file get_supplementary_file.php]

## Supporting information

### Appendix 1: Method validation Summary for the used HPLC analytical method

| <b>PARAMETER</b>   | <b>STATISTICAL MEASURE</b> | <b>RESULT</b>     |                   | <b>LIMITS</b>                                                        |
|--------------------|----------------------------|-------------------|-------------------|----------------------------------------------------------------------|
| <b>Specificity</b> | None                       | Complies          |                   | No interference between the active material peak and any other peaks |
| <b>Accuracy</b>    | For 100%                   | 100.02            |                   | 96.00 - 104.00 %                                                     |
| <b>Precision</b>   | Coefficient of variation   | 0.38              |                   | Max 2.0 (CV)                                                         |
| <b>Linearity</b>   | Correlation Coefficient    | 0.99976           |                   | Min 0.995 (R <sup>2</sup> )                                          |
| <b>Ruggedness</b>  | RSD                        | Different analyst | Different elapsed | Max 3.0 (RSD)                                                        |
|                    |                            | 0.005             | 0.09              |                                                                      |

**Appendix 2: Method validation summary for the used dissolution method**

| <b>PARAMETER</b> | <b>STATISTICAL<br/>MEASURE</b>            | <b>RESULT</b>       | <b>LIMITS</b>                                                  |
|------------------|-------------------------------------------|---------------------|----------------------------------------------------------------|
| <b>Accuracy</b>  | % of Recovery                             | 104.7               | Not Less than 75.0% of<br>stated amount dissolved<br>in 30 min |
| <b>Precision</b> | Coefficient of<br>Variation               | 0.74                | Maximum 2.00                                                   |
| <b>Linearity</b> | Correlation<br>Coefficient<br>Y-Intercept | 0.99994<br><br>0.03 | Minimum 0. 995<br><br>± 5.0 % of the average<br>area           |

**Appendix 3: Assessment of results against acceptance criteria for impurity A1**

| <b>Parameter</b> | <b>Statistical Measure</b> | <b>Result</b>     |                   | <b>Limits</b>                                                         |
|------------------|----------------------------|-------------------|-------------------|-----------------------------------------------------------------------|
| Specificity      | None                       | Complies          |                   | No interference between the active material peak and any other peaks. |
| Accuracy         | For 100%                   | 99.81             |                   | 96.0 - 104.0                                                          |
| Precision        | Coefficient of variation   | 0.31              |                   | Max 3.0                                                               |
| Linearity        | Correlation Coefficient    | 0.99899           |                   | Min 0.995                                                             |
| Ruggedness       | RSD                        | Different analyst | Different elapsed | Max 5.0                                                               |
|                  |                            | 0.55              | 0.59              |                                                                       |

**Appendix 4: Assessment of results against acceptance criteria system suitability**

| <b>Parameter</b> | <b>Statistical Measure</b>   | <b>Result</b> | <b>Limits</b>             |
|------------------|------------------------------|---------------|---------------------------|
| Resolution       | For Impurity A3              | 3.5           | NLT 1.5 Between CR and A3 |
| Tailing Factor   | For Impurity B               | 1.02          | NMT 1.5 for Impurity B    |
| RSD              | For Standard<br>Solution (1) | 1.10          | NMT 2.0%                  |

**Appendix 5: Assessment of results against acceptance criteria for impurity A2**

| <b>Parameter</b> | <b>Statistical Measure</b> | <b>Result</b>     |                        | <b>Limits</b>                                                         |
|------------------|----------------------------|-------------------|------------------------|-----------------------------------------------------------------------|
| Specificity      | None                       | Complies          |                        | No interference between the active material peak and any other peaks. |
| Accuracy         | For 100%                   | 100.05            |                        | 96.0 - 104.0                                                          |
| Precision        | Coefficient of variation   | 0.62              |                        | Max 3.0                                                               |
| Linearity        | Correlation Coefficient    | 0.99808           |                        | Min 0.995                                                             |
| Ruggedness       | RSD                        | Different analyst | Different elapsed time | Max 5.0                                                               |
|                  |                            | 1.42              | 0.95                   |                                                                       |

**Appendix 6: Assessment of results against acceptance criteria for impurity A3**

| <b>Parameter</b> | <b>Statistical Measure</b> | <b>Result</b>     |                        | <b>Limits</b>                                                         |
|------------------|----------------------------|-------------------|------------------------|-----------------------------------------------------------------------|
| Specificity      | None                       | Complies          |                        | No interference between the active material peak and any other peaks. |
| Accuracy         | For 100%                   | 99.36             |                        | 96.0 - 104.0                                                          |
| Precision        | Coefficient of variation   | 2.13              |                        | Max 3.0                                                               |
| Linearity        | Correlation Coefficient    | 0.99809           |                        | Min 0.995                                                             |
| Ruggedness       | RSD                        | Different analyst | Different elapsed time | Max 5.0                                                               |
|                  |                            | 2.16              | 1.18                   |                                                                       |

**Appendix 7: Assessment of results against acceptance criteria for impurity A4**

| <b>PARAMETER</b> | <b>STATISTICAL MEASURE</b> | <b>RESULT</b>     |                        | <b>LIMITS</b>                                                         |
|------------------|----------------------------|-------------------|------------------------|-----------------------------------------------------------------------|
| Specificity      | None                       | Complies          |                        | No interference between the active material peak and any other peaks. |
| Accuracy         | For 100%                   | 100.06            |                        | 96.0 - 104.0                                                          |
| Precision        | Coefficient of variation   | 1.77              |                        | Max 3.0                                                               |
| Linearity        | Correlation Coefficient    | 0.99865           |                        | Min 0.995                                                             |
| Ruggedness       | RSD                        | Different analyst | Different elapsed time | Max 5.0                                                               |
|                  |                            | 1.43              | 1.36                   |                                                                       |

**Appendix 8: Assessment of results against acceptance criteria for impurity B**

| Parameter                        | Statistical Measure      | Result            |                        | Limits                                                                |
|----------------------------------|--------------------------|-------------------|------------------------|-----------------------------------------------------------------------|
| Specificity                      | None                     | Complies          |                        | No interference between the active material peak and any other peaks. |
| Accuracy                         | For 100%                 | 99.50             |                        | 96.0 - 104.0                                                          |
| Precision                        | Coefficient of variation | 0.61              |                        | Max 3.0                                                               |
| Linearity                        | Correlation Coefficient  | 0.99986           |                        | Min 0.995                                                             |
| Ruggedness                       | RSD                      | Different analyst | Different elapsed time | Max 5.0                                                               |
|                                  |                          | 0.53              | 0.26                   |                                                                       |
| Detection and Quantitation Limit | RSD                      | 1.53              |                        | Max 5.0%                                                              |
